# Supplementary material
Source: PubMed Central journal article supplement (PMC7409265)
Supplement: ao0c02894_si_001.pdf [file ao0c02894_si_001.pdf]

**Optical and Magnetic Properties of Ag-Ni Bimetallic Nanoparticles Assembled via Pulsed Laser Induced Dewetting**

David A. Garfinkel<sup>1</sup>, Grace Pakeltis<sup>1</sup>, Nan Tang<sup>1</sup>, Iliia N. Ivanov<sup>2</sup>, Jason D. Fowlkes<sup>1,2</sup>, Dustin A. Gilbert<sup>1</sup>, Philip D. Rack<sup>1,2,\*</sup>

1. Department of Materials Science and Engineering, University of Tennessee, Knoxville, Tennessee 37996, United States

2. Center for Nanophase Materials Sciences, Oak Ridge National Laboratory, Oak Ridge, Tennessee 37831, United States

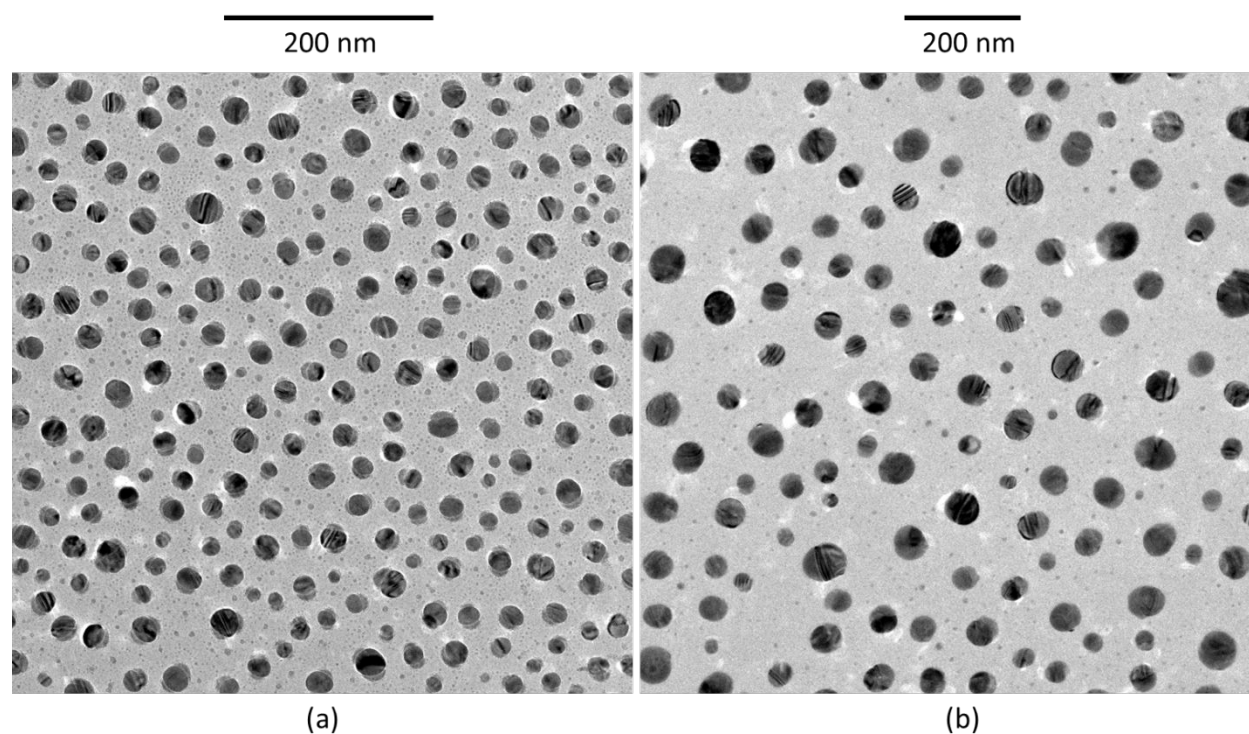

*Figure S1: Enlarged TEM images (found in Figure 1) of 3 nm (a) and 5 nm (b) PLiD samples demonstrating Janus particles*

## Supporting Information

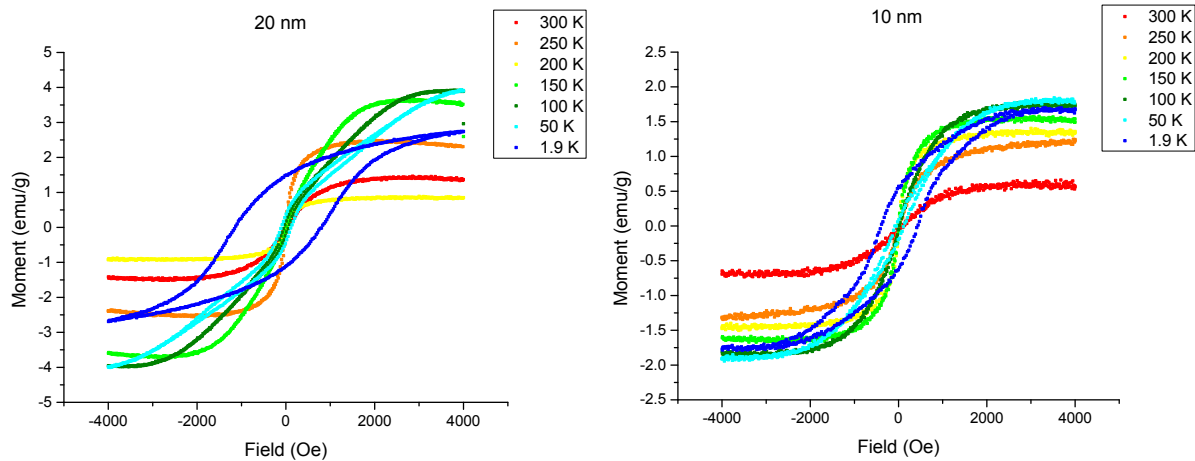

Figure S2: Magnetic hysteresis loops as a function of testing temperature for the 20 and 10 nm as-deposited films

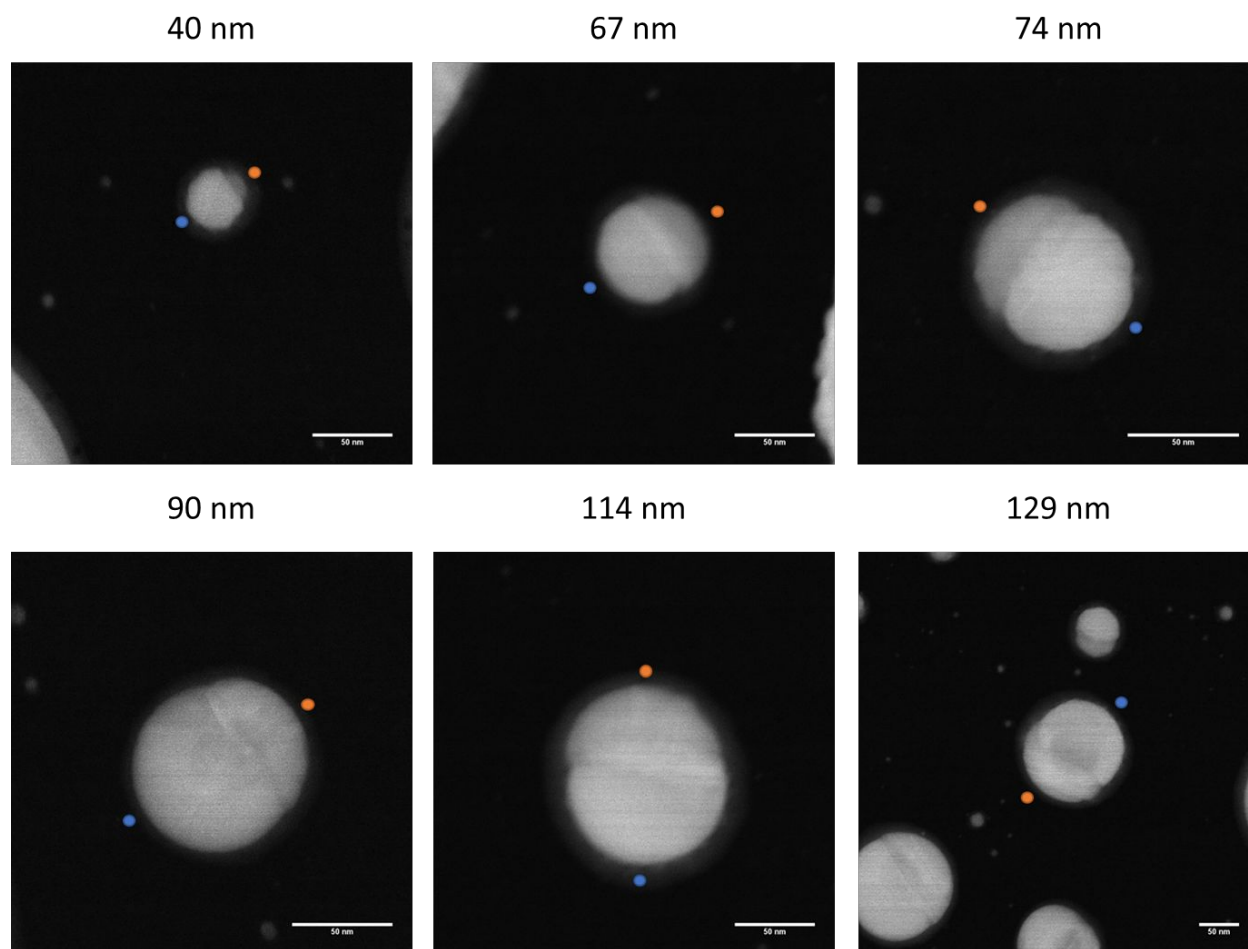

Figure S3: STEM images of PLiD EELS samples demonstrating Janus particles via Z-contrast imaging
